# Supplementary material for: Thermo- and pH-tolerant xylanase-immobilized magnetic Zr-MOF composites as recyclable biocatalysts for the degradation of corn straw
Source: Royal Society of Chemistry journal article supplement (doi:10.1039/d4nj03377a), 2024-01-01
Supplement: d4nj03377a1.pdf [file d4nj03377a1.pdf]

## Supplementary materials

### **Thermo- and pH-tolerance xylanase immobilized magnetic responsive Zr-MOFs composites as recyclable biocatalyst for the degradation of corn straw**

Qingtai Chen<sup>1</sup>, Chongchong Wu<sup>2\*</sup>, Shujie Hu<sup>3</sup>, Lizhi Cui<sup>4</sup>, Yong Zhang<sup>5</sup>, Peng Hu<sup>1</sup>, Pei Yu<sup>1</sup>, Zhi Xu<sup>1</sup>, Miao Yu<sup>1\*</sup>

1. School of Chemistry and Pharmaceutical Engineering, Huanghuai University, Zhumadian 463000, China ;
2. CNOOC Institute of Chemicals & Advanced Materials, Beijing 102200, China ;
3. School of Physical Education, Huanghuai University, Zhumadian 463000, China ;
4. China Meheco Topfond Pharmaceutical Co. Ltd, Zhumadian 463000, China ;
5. Inspection and Testing Center, Zhumadian Bureau of Quality and Technical Supervision, Zhumadian 463000, China.

\* Corresponding Authors' E-mail: [chongchong.wu@ucalgary.ca](mailto:chongchong.wu@ucalgary.ca); [miaoy050666@126.com](mailto:miaoy050666@126.com);

## Experiment section

### magnetic Zr-MOFs particles characterization

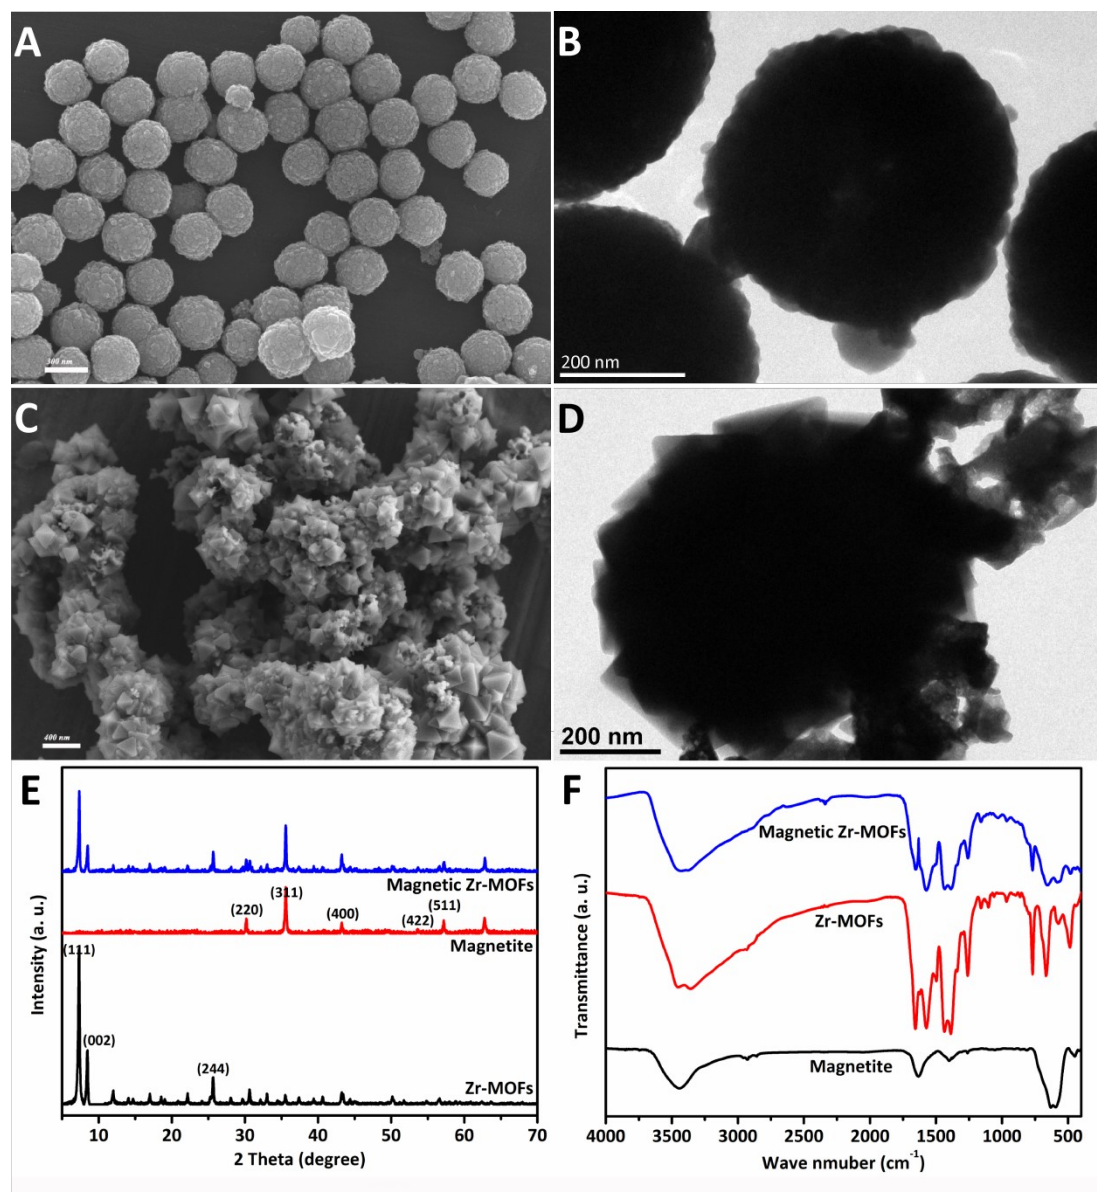

**Fig. S1** Morphology and structural characterization of magnetic Zr-MOFs particles and their precursor. SEM images (A and C) and TEM images (B and D) of  $\text{Fe}_3\text{O}_4$  and magnetic Zr-MOFs particles, respectively; XRD patterns (E) and FTIR spectra (F) of magnetic Zr-MOFs particles and their precursor, respectively.
